# Supplementary material for: Enhancing Academic Performance in Tertiary Education through Social Media: A Multi-Arm Randomized Controlled Trial
Source: Research Square preprint supplement (doi:10.21203/rs.3.rs-7932578/v1), 2025-11-17
Supplement: Supplementary file 1 [file 4d5dde2cace369a83fef3c6c.docx]

*SUPPLEMENTARY ONLINE MATERIAL*

**Table A**

*Sociodemographic Characteristics of Individuals Initially Invited to Participate (n = 170)*

|  | Total (*n* = 170) | G1 (*n* = 36) | G2 (*n* = 34) | G3 (*n* = 31) | G4 (*n* = 34) | G5 (*n* = 35) |
| --- | --- | --- | --- | --- | --- | --- |
| Gender, % (*n*) |  |  |  |  |  |  |
| Female | 96.87 (155) | 91.7 (33) | 91.18 (31) | 98.8 (30) | 97.1 (33) | 80 (28) |
| Male | 9.37 (15) | 8.4 (3) | 8.82 (3) | 3.22 (1) | 2.94 (1) | 20 (7) |
| Mean age, years (*SD*) | 41.63 (8.59) | 40.61 (8.72) | 41.48 (8.34) | 42.74 (7.16) | 43.32 (9.16) | 40.17 (9.30) |
| Years of education (*SD*) | 16.50 (5.44) | 17.53 (5.14) | 16.65 (5.53) | 16.06 (4.94) | 17.56 (5.36) | 14.51 (5.84) |
| Mean BL performance (*SD*) | 12.26 (2,18) | 12.19 (1.64) | 12.42 (2.04) | 12.62 (2.11) | 12.35 (2.42) | 11.79 (2.62) |
| Country, % (*n*) |  |  |  |  |  |  |
| U. S | 95.62 (143) | 91.7 (33) | 85.29 (29) | 93.55 (29) | 94.12 (32) | 82.85 (29) |
| Others | 10.62 (17) | 8.4 (3) | 14.28 (5) | 6.45 (2) | 5.88 (2) | 17.14 (6) |
| Socioeconomic Status, % (*n*) |  |  |  |  |  |  |
| Lower-middle | 62.35 (106) | 50.00 (18) | 67.65 (24) | 70.97 (22) | 50.00 (17) | 71.43 (26) |
| Middle | 4.70 (8) | 2.78 (5) | 2.94 (1) | 3.23 (1) | 2.94 (2) | 5.71 (2) |
| Upper-middle | 31.17 (53) | 38.89 (14) | 23.53 (9) | 16.13 (7) | 41.18 (15) | 20.00 (7) |
| Upper class | 1.76 (3) | 8.33 (3) | 0.00 (0) | 3.23 (1) | 0.00 (0) | 0.00 (0) |

**Table B**

*Summary of Procedural Integrity Analysis*

|  | G1 | G2 | G3 | G4 | G5 |
| --- | --- | --- | --- | --- | --- |
| *Baseline* |  |  |  |  |  |
| No. of daily posts | 3 | 3 | 3 | 3 | 3 |
| No. weekly videos | 2 | 2 | 2 | 2 | 2 |
| Instructor feedback latency1 | 74.4±37.8 | 99.7±46.1 | 82.4±39.7 | 81.7±35.7 | 94.2±47.7 |
| Relevant video content2, *%* | 0.0 | 0.0 | 0.0 | 0.0 | 0.0 |
| No. self-management posts | 0 | 0 | 0 | 0 | 0 |
| Self-management posts format3 | 0:0 | 0:0 | 0:0 | 0:0 | 0:0 |
| No. cooperative learning posts | 0 | 0 | 0 | 0 | 0 |
| *Intervention* |  |  |  |  |  |
| No. of daily posts | 3 | 3 | 3 | 3 | 3 |
| No. weekly videos | 2 | 2 | 2 | 2 | 2 |
| Instructor feedback latency1 | 0.82±1.9 | 83.10±36.4 | 3.9±6.4 | 5.8±8.1 | 107.7±24.3 |
| Relevant video content2, *%* | 95.4 | 91.7 | 0.0 | 95.6 | 0.0 |
| No. self-management posts | 1 | 1 | 0 | 3 | 0 |
| Self-management posts format3 | 4:8 | 4:8 | 0:8 | 8:8 | 0:0 |
| No. cooperative learning posts | 1 | 1 | 3 | 0 | 0 |
| *Post-Intervention* |  |  |  |  |  |
| No. of daily posts | 3 | 3 | 3 | 3 | 3 |
| No. weekly videos | 2 | 2 | 2 | 2 | 2 |
| Instructor feedback latency1 | 120.4±75.8 | 84.8±39.3 | 72.6±41.0 | 85.3±46.9 | 110.4±38.3 |
| Relevant video content2, *%* | 0.0 | 0.0 | 0.0 | 0.0 | 0.0 |
| No. self-management posts | 0 | 0 | 0 | 0 | 0 |
| Self-management posts format3 | 0:0 | 0:0 | 0:0 | 0:0 | 0:0 |
| No. cooperative learning posts | 0 | 0 | 0 | 0 | 0 |

*Notes.* G1 = BE-Social; G2 = BE-Social without semi-immediate feedback; G3 = Cooperative learning; G4 = Self-management; G5 = Control group. Instructor feedback latency and relevant video content as coded on 20% of randomly selected instructor video posts within each group and study phase. 1. Hours (*Mean ± SD*); 2. Percentage of partial intervals with the instructor presenting self-management skills during video broadcasts; 3. Video posts vs. textual posts (V:T).

**Table C**

*Unsolicited Positive Comments during Farewell Video Broadcast*

| Group | *n* (%) |
| --- | --- |
| Control | 9 (33.3) |
| G1: BE-Social | 12 (44.4) |
| G2: BE-Social without semi-immediate feedback | 14 (51.9) |
| G3: Cooperative learning | 6 (18.2) |
| G4: Self-Management | 5 (18.5) |
| Total | 44 (32.6) |

**Appendix 1**

*Examples of Self-Management Posts*

| *#* | *Procedure* | *Content Type* | *Target Skill* | *Selection of Textual Content* |
| --- | --- | --- | --- | --- |
| 1 | Self-recording | Textual and visual | Independent study habits | “Hey, here is a simple example of a self-recording form: “Total number of hours I spent studying last week, 2 + 3 + 2 + 1 + 2 + 2 + 1 + 2 + 1 + 2 + 1 + 1 + 1 = 21 h” |
| 2 | Goal setting | Textual and visual | Independent study habits | “Check out this list of topics you have to study and next to it write down the number of pages in the study material for each of them. Please, do the same for other sections and share away!” |
| 3 | Goal setting | Textual and visual | Independent study habits | “Hey, let’s write down on a sheet of paper the activities you have to do before you start studying: (1) collect the notes taken from videos and literature on the subject, (2) organize your study space, (3) warn those around you that you are not to be disturbed, (4) switch off your phone.” |
| 4 | Goal setting, self- recording, self-reinforce-ment | Textual and visual | Independent study habits | “Let’s create a schedule with the day of the week and your available study hours. Then divide the time as follows: 30 minutes study, 10 minutes rest, 30 minutes study, 10 minutes rest, etc.” |
| 5 | Goal setting, self- recording | Textual and visual | Independent study habits | “When studying a new lesson, create a list with all the new concepts. Then try to memorize them. Write up the concepts in a blank piece of paper keeping the reference material away from you. When you are done, mark the concepts that you did recall correctly, and note the time it took you. Keep track of your memorization timing!” |

**Appendix 2**

*Example Timeline of a Video Modeling Post*

| *Event #* | *Start and End*  *h:mm:ss, h:mm:ss* | *Event*  *Description* |
| --- | --- | --- |
| 1 | N/A | Post text: “I am going to demonstrate the studying strategy discussed in an earlier post by memorizing concepts written on flashcards. Please, use your own flashcards to complete this activity. You practice at the same time and repeat the video to help you stay on track as many times as you like. Let us know about how it goes in the comments.” |
| 2 | 0:00:01, 0:00:05 | The instructor sets up a 20-min timer alarm on an iPad. |
| 3 | 0:00:05, 0:05:00 | The instructor works on a large whiteboard. There are 50 small color flashcards attached to the wall to the left of the whiteboard. Each card contains the definition of a key course concept. The instructor writes in the whiteboard a list with the first 20 concepts that are defined in the cards. The text in the flashcards and the whiteboard are not visible in the video. [Students need to use their own flashcards to participate in the activity]. |
| 4 | 0:05:00, 0:20:00 | The instructor reads out loud the definition of the first concept, steps away from the flashcard, and writes the definition on the whiteboard in his/her own words. The process is repeated for every concept. Each reading and re-writing cycle takes approximately one minute. The instructor paces herself as to complete the process for the 20 first concept before the timer alarm goes off. |
| 5 | 0:20:00, 0:30:00 | The alarm goes off and the instructor gives a 10-min break. The instructor sets a new 10-min timer alarm. The video streaming continues during the break: the instructor is shown quietly in her desk resting and looking at her phone. The alarm goes off signaling the end of the break period. |
| 6 | 0:30:01, 0:30:05 | The instructor sets a new 30-min timer alarm. |
| 7 | 0:30:06, 0:30:10 | The instructor writes a list with the remaining 30 concepts on the whiteboard. |
| 8 | 0:30:10, 1:00:00 | The process described in event #3 is repeated for the 30 remaining flashcards. |
| 9 | 1:00:00, 1:00:30 | The alarm goes off and the session ends. The instructor thanks those who attended and encourage students to use the video to practice the strategy as often as they like. |

*Note*. N/A = Non-applicable.
